# Supplementary material for: Improvements in sleep‐disordered breathing during acclimatization to 3800 m and the impact on cognitive function
Source: PubMed Central journal article supplement (PMC8123551; doi:10.14814/phy2.14827), 2021-05-15
Supplement: PHY2-9-e14827-s001.pdf [file PHY2-9-e14827-s001.pdf]

**Supplemental Table 1.** Spearman's correlations for physiology and sleep data associations with cognitive test performance.

| Test  | Measure            | Day SpO <sub>2</sub> | AMS                             | AHI                           | Hypop. Index                   | Apnea Index                     | Central Apnea Index | ODI                            | Avg. Night SpO <sub>2</sub>     | T80                             | Sleep Effic.                    | WASO              | PROMIS                         | SSS               |
|-------|--------------------|----------------------|---------------------------------|-------------------------------|--------------------------------|---------------------------------|---------------------|--------------------------------|---------------------------------|---------------------------------|---------------------------------|-------------------|--------------------------------|-------------------|
| PVT   | Mean reaction time | -0.119<br>(0.684)    | 0.126<br>(0.668)                | 0.433<br>(0.25)               | 0.367<br>(0.336)               | 0.251<br>(0.515)                | 0.525<br>(0.146)    | 0.524<br>(0.197)               | 0.566<br>(0.143)                | -0.333<br>(0.428)               | -0.358<br>(0.313)               | 0.079<br>(0.838)  | <b>0.748</b><br><b>(0.002)</b> | -0.027<br>(0.926) |
|       | Lapses             | -0.208<br>(0.475)    | 0.276<br>(0.34)                 | 0.436<br>(0.241)              | 0.333<br>(0.381)               | 0.316<br>(0.407)                | 0.513<br>(0.158)    | 0.577<br>(0.134)               | 0.553<br>(0.155)                | -0.319<br>(0.441)               | -0.499<br>(0.142)               | 0.075<br>(0.837)  | <b>0.684</b><br><b>(0.007)</b> | -0.028<br>(0.924) |
|       | False starts       | -0.22<br>(0.45)      | 0.147<br>(0.617)                | -0.017<br>(0.965)             | -0.373<br>(0.323)              | -0.356<br>(0.347)               | 0.353<br>(0.352)    | -0.704<br>(0.051)              | -0.613<br>(0.106)               | 0.704<br>(0.051)                | 0.131<br>(0.719)                | 0.449<br>(0.193)  | -0.253<br>(0.383)              | -0.448<br>(0.108) |
| BART  | Mean reaction time | 0.084<br>(0.775)     | -0.716<br>(0.004)               | -0.3<br>(0.437)               | -0.5<br>(0.178)                | <b>-0.707</b><br><b>(0.033)</b> | 0.186<br>(0.631)    | -0.571<br>(0.151)              | -0.675<br>(0.066)               | <b>0.881</b><br><b>(0.007)</b>  | 0.224<br>(0.537)                | -0.37<br>(0.296)  | -0.257<br>(0.376)              | -0.041<br>(0.89)  |
|       | Pumps              | 0.349<br>(0.221)     | 0.126<br>(0.668)                | -0.267<br>(0.493)             | 0.05<br>(0.912)                | 0.114<br>(0.77)                 | -0.576<br>(0.104)   | 0.214<br>(0.619)               | 0.265<br>(0.526)                | -0.619<br>(0.115)               | 0.2<br>(0.584)                  | -0.2<br>(0.584)   | -0.166<br>(0.571)              | 0.313<br>(0.275)  |
| DSST  | Mean reaction time | -0.44<br>(0.116)     | 0.171<br>(0.56)                 | -0.2<br>(0.613)               | -0.267<br>(0.493)              | -0.023<br>(0.954)               | 0.153<br>(0.695)    | -0.238<br>(0.582)              | -0.133<br>(0.754)               | 0.476<br>(0.243)                | -0.394<br>(0.263)               | -0.43<br>(0.218)  | 0.363<br>(0.202)               | -0.186<br>(0.524) |
|       | Correct responses  | 0.42<br>(0.135)      | -0.169<br>(0.564)               | 0.151<br>(0.698)              | 0.21<br>(0.587)                | -0.023<br>(0.953)               | -0.171<br>(0.66)    | 0.193<br>(0.647)               | 0.03<br>(0.943)                 | -0.386<br>(0.346)               | 0.426<br>(0.22)                 | 0.383<br>(0.275)  | -0.397<br>(0.159)              | 0.145<br>(0.622)  |
| LOT   | Mean reaction time | 0.477<br>(0.084)     | -0.512<br>(0.061)               | 0.45<br>(0.23)                | 0.517<br>(0.162)               | 0.183<br>(0.638)                | 0.136<br>(0.728)    | 0.452<br>(0.267)               | 0.265<br>(0.526)                | -0.048<br>(0.935)               | -0.03<br>(0.946)                | -0.164<br>(0.657) | -0.305<br>(0.288)              | -0.204<br>(0.483) |
|       | Correct responses  | 0.323<br>(0.261)     | 0.253<br>(0.383)                | 0.559<br>(0.117)              | <b>0.695</b><br><b>(0.038)</b> | <b>0.743</b><br><b>(0.022)</b>  | 0.069<br>(0.86)     | 0.317<br>(0.444)               | <b>0.753</b><br><b>(0.031)</b>  | -0.586<br>(0.127)               | -0.325<br>(0.359)               | 0.117<br>(0.748)  | -0.21<br>(0.47)                | 0.005<br>(0.988)  |
| NBACK | Mean reaction time | 0.29<br>(0.315)      | 0.314<br>(0.274)                | 0.317<br>(0.41)               | 0.3<br>(0.437)                 | 0.548<br>(0.127)                | -0.237<br>(0.539)   | 0.69<br>(0.069)                | <b>0.928</b><br><b>(-0.001)</b> | <b>-0.833</b><br><b>(0.015)</b> | <b>-0.648</b><br><b>(0.049)</b> | -0.103<br>(0.785) | 0.442<br>(0.113)               | 0.466<br>(0.093)  |
|       | Correct responses  | 0.055<br>(0.853)     | -0.347<br>(0.224)               | 0.209<br>(0.589)              | 0.31<br>(0.417)                | 0.16<br>(0.68)                  | -0.204<br>(0.598)   | 0.515<br>(0.192)               | 0.467<br>(0.244)                | -0.467<br>(0.243)               | -0.11<br>(0.763)                | -0.5<br>(0.141)   | 0.127<br>(0.665)               | 0.247<br>(0.394)  |
| VOLT  | Mean reaction time | -0.033<br>(0.91)     | 0.054<br>(0.855)                | -0.083<br>(0.843)             | -0.417<br>(0.27)               | -0.023<br>(0.954)               | -0.051<br>(0.897)   | -0.238<br>(0.582)              | 0.229<br>(0.586)                | 0.024<br>(0.977)                | <b>-0.685</b><br><b>(0.035)</b> | -0.115<br>(0.759) | 0.137<br>(0.64)                | 0.459<br>(0.099)  |
|       | Correct responses  | 0.327<br>(0.253)     | 0.053<br>(0.856)                | <b>0.798</b><br><b>(0.01)</b> | <b>0.714</b><br><b>(0.031)</b> | <b>0.713</b><br><b>(0.031)</b>  | 0.299<br>(0.434)    | <b>0.759</b><br><b>(0.029)</b> | <b>0.848</b><br><b>(0.008)</b>  | <b>-0.892</b><br><b>(0.003)</b> | -0.372<br>(0.29)                | 0.354<br>(0.316)  | 0.253<br>(0.383)               | 0.343<br>(0.229)  |
| AM    | Mean reaction time | 0.261<br>(0.368)     | 0.213<br>(0.464)                | -0.3<br>(0.437)               | -0.317<br>(0.41)               | -0.16<br>(0.681)                | -0.153<br>(0.695)   | 0<br>(>0.99)                   | 0.012<br>(0.977)                | -0.286<br>(0.501)               | -0.018<br>(0.973)               | 0.345<br>(0.331)  | -0.144<br>(0.624)              | 0.182<br>(0.534)  |
|       | Correct responses  | -0.125<br>(0.67)     | -0.306<br>(0.287)               | -0.393<br>(0.295)             | -0.536<br>(0.137)              | -0.527<br>(0.145)               | -0.136<br>(0.727)   | -0.357<br>(0.389)              | -0.337<br>(0.414)               | 0.286<br>(0.501)                | 0.146<br>(0.687)                | -0.122<br>(0.737) | 0.013<br>(0.964)               | 0.122<br>(0.678)  |
| MPT   | Mean reaction time | 0.04<br>(0.893)      | <b>-0.692</b><br><b>(0.006)</b> | -0.183<br>(0.644)             | -0.4<br>(0.291)                | <b>-0.707</b><br><b>(0.033)</b> | 0.17<br>(0.663)     | -0.19<br>(0.665)               | -0.386<br>(0.346)               | 0.524<br>(0.197)                | -0.103<br>(0.785)               | -0.224<br>(0.537) | 0.23<br>(0.429)                | 0.329<br>(0.25)   |

Values are provided as Spearman's rho (p-value). No correlations were significant after correcting for multiple comparisons (adj. p > 0.05 for all).
